# Supplementary material for: Bayesian inference of ancestral recombination graphs
Source: PubMed Central journal article supplement (PMC8936483; doi:10.1371/journal.pcbi.1009960), 2022-03-09
Supplement: pcbi.1009960.s002.pdf [file pcbi.1009960.s002.pdf]

| Methods        | $R = 1$               | $R = 2$               | $R = 4$ |
|----------------|-----------------------|-----------------------|---------|
| ARGinfer       | 0.88                  | 0.90                  | 0.45    |
| ARGweaver (20) | $2.6 \times 10^{-17}$ | $2.4 \times 10^{-10}$ | 0.014   |
| ARGweaver (40) | $1.1 \times 10^{-11}$ | $6.5 \times 10^{-7}$  | 0.05    |
