# Supplementary material for: Bayesian inference of ancestral recombination graphs
Source: PubMed Central journal article supplement (PMC8936483; doi:10.1371/journal.pcbi.1009960), 2022-03-09
Supplement: pcbi.1009960.s003.pdf [file pcbi.1009960.s003.pdf]

Log(posterior density)

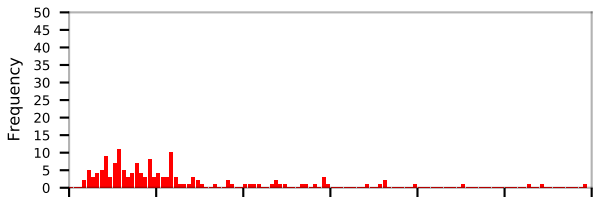

R= 1

Number of non ancestral recombination

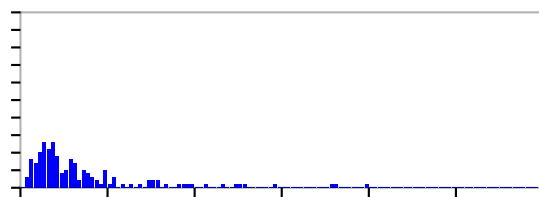

R= 2

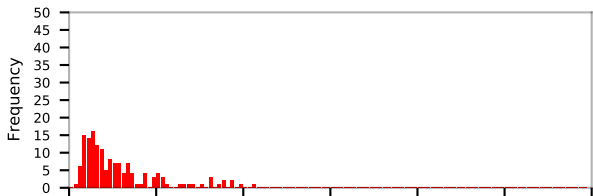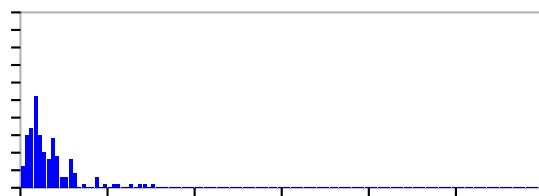

R= 4

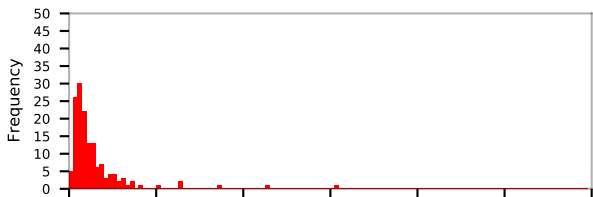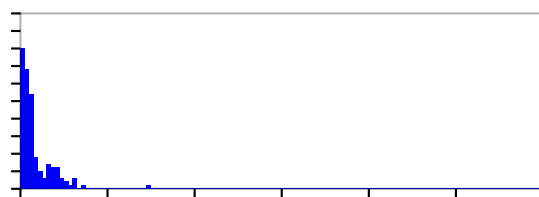**T'****T'**
