# Supplementary material for: Bayesian inference of ancestral recombination graphs
Source: PubMed Central journal article supplement (PMC8936483; doi:10.1371/journal.pcbi.1009960), 2022-03-09

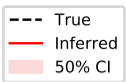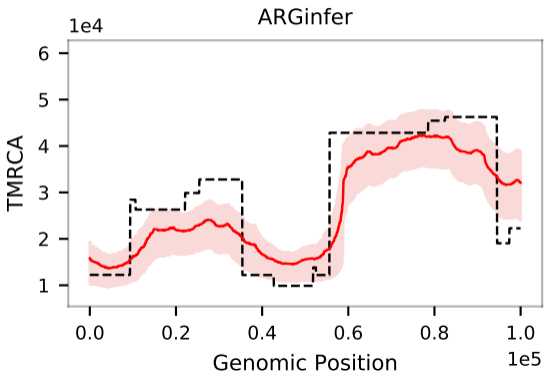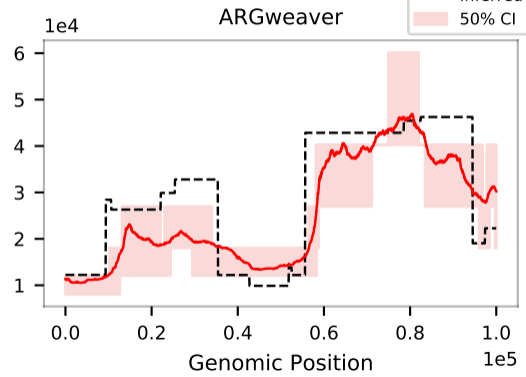

Supplement: pcbi.1009960.s008.pdf [file pcbi.1009960.s008.pdf]
